# Supplementary material for: Fabrication of poly(methyl methacrylate) capillary electrophoresis microchips by in situ surface polymerization
Source: Royal Society of Chemistry journal article supplement (doi:10.1039/b515842g), 2005-11-30
Supplement: b515842g.doc [file b515842g.doc]

**Fabrication of poly(methyl methacrylate) capillary electrophoresis microchips by *in situ* surface polymerization**

Supplementary Material (ESI) for Lab on a Chip

This journal is © The Royal Society of Chemistry 2006

# Guoxi Xu,*a* Joseph Wang,*b* Yi Chen,*a* Luyan Zhang,*a* Derong Wang,*a* and Gang Chen* *a*

a Department of Chemistry, Fudan University, Shanghai 200433, China. Fax: 86 21 65641740; Email: [gangchen@fudan.edu.cn](mailto:gangchen@fudan.edu.cn)

*b Departments of Chemical & Materials Engineering and Chemistry,* **Arizona State University, Tempe, AZ 85287-5001, USA*

*To whom correspondence should be addressed.

Fax: 86-21-6564-1740. E-mail: [gangchen@fudan.edu.cn](mailto:gangchen@fudan.edu.cn)

**ESI-Fig. 1.** Schematic of the sandwich molding process. (A) casting the MMA prepolymer molding solution (a) on the nickel template (b); (B) sandwiching the molding solution between the PMMA plate (c) and the nickel template (b); (C) exposing the sandwich mold to the UV light (d); (D) demolding of the polymerized PMMA substrate with channels (e); (E) thermal sealing of the two PMMA plates to form the complete microchip (f). (g) cover plate. Dimensions are not in scale.

**ESI-Fig. 2.** Scanning electron micrographs (SEMs) of the cross sections of (A) an unsealed microchannel in the PMMA substrate and the channels in the complete PMMA electrophoresis microchips Conditions: accelerating voltage, 20 kV; magnification,  200.
